# Supplementary material for: The Effect of Bacterial Signal Indole on the Electrical Properties of Lipid Membranes
Source: PubMed Central journal article supplement (PMC3790958; doi:10.1002/cphc.201200793), 2013-01-09
Supplement: cphc0014-0417-SD1.pdf [file cphc0014-0417-SD1.pdf]

# CHEMPHYSICHEM

## Supporting Information

© Copyright Wiley-VCH Verlag GmbH & Co. KGaA, 69451 Weinheim, 2013

### **The Effect of Bacterial Signal Indole on the Electrical Properties of Lipid Membranes**

Catalin Chimere<sup>[a]</sup>, Andrew J. Murray<sup>[b]</sup>, Enno R. Oldewurtel<sup>[a]</sup>, David K. Summers<sup>[c]</sup> and Ulrich F. Keyser<sup>\*[a]</sup>

cphc\_201200793\_sm\_miscellaneous\_information.pdf

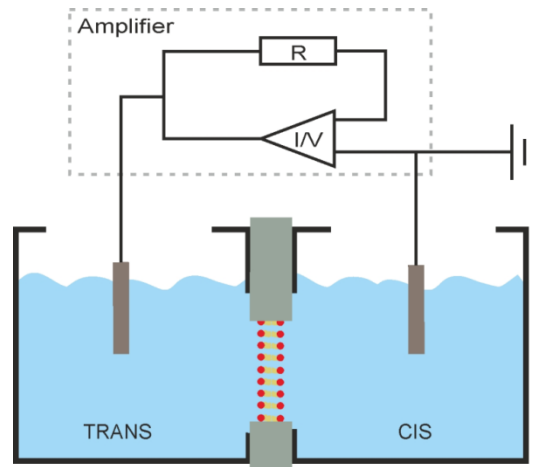

Supplementary Figure 1. Scheme of the electrophysiology set-up used to measure currents through lipid membranes.

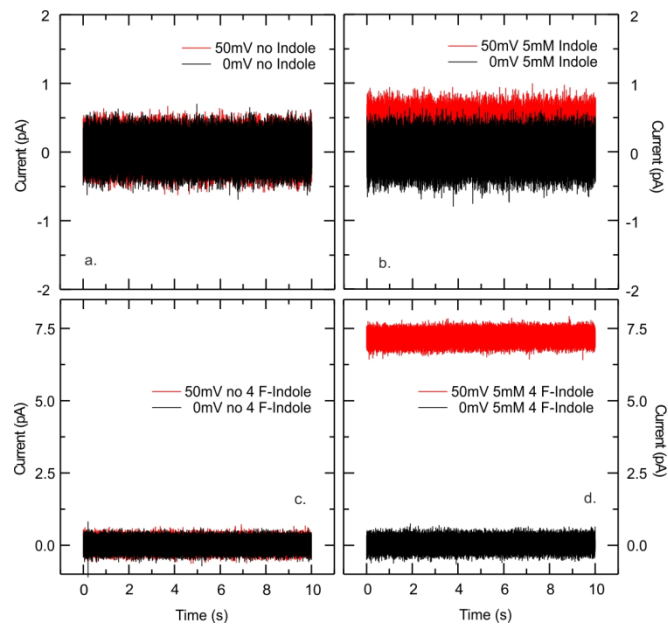

Supplementary Figure 2. Current traces measured in the presence of indole and 4 F-indole. In the top panels the current through the lipid membrane at 0 mV and +50 mV is measured in the absence of indole, a., and in the presence of 5 mM indole, b. In the bottom panels the current through the lipid membrane at 0 mV and +50 mV is measured in the absence of 4 F-indole, c., and in the presence of 5 mM 4 F-indole, d. All traces were measured with an acquisition frequency of 10kHz and a sampling frequency of 50kHz. Post acquisition the traces were filtered with a low pass filter with a cutoff frequency of 2kHz.

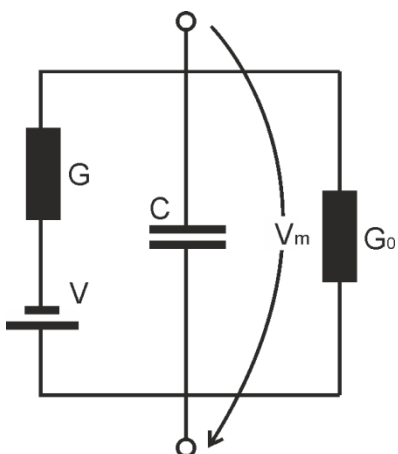

Supplementary Figure 3. Equivalent circuit of a lipid membrane exposed to a pH gradient in the presence of an ionophore which selectively transports charge across the membrane. The capacitance of the lipid membrane is denoted with  $C$ . All the other physical measures are defined as in equations 1 to 6.

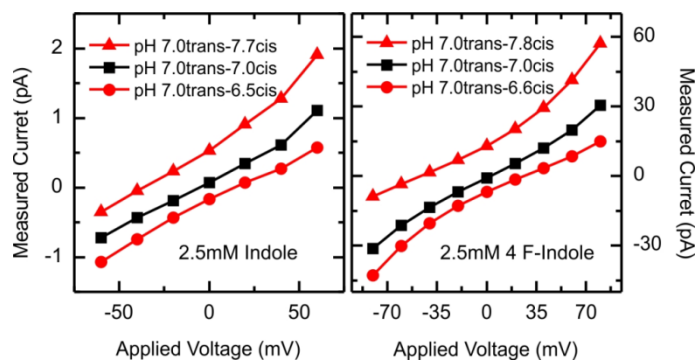

Supplementary Figure 4. The effect of a pH gradient on the IV characteristics of a *DPhPC* lipid membrane in the presence of 2.5 mM indole or 2.5 mM 4 F-indole. The *TRANS* chamber is held at pH 7.0 while the pH in the *CIS* chamber is varied. Symbols denote the pH on either side of the membrane.
